# Supplementary material for: Genome Sequencing Provides Novel Insights into Mudflat Burrowing Adaptations in Eel Goby Taenioides sp. (Teleost: Amblyopinae)
Source: MDPI journal article supplement (doi:10.3390/ijms241612892), 2023-08-17
Supplement: s1 [file s1]

Table S1 Statistics of short read data produced by MGIDNB T7 platform

| Read number | Base count (Gb) | Mean length (bp) | Q20 (%) | Q30 (%) | GC content (%) |
|-------------|-----------------|------------------|---------|---------|----------------|
| 521,365,080 | 78.20           | 150              | 97.25   | 90.68   | 40.87          |

Table S2 Statistics of the genome survey for *Taenioides* sp based on 17-mer analysis

| K-mer number   | K-mer depth | Genome size (Mb) | Revised genome size (Mb) | Heterozygous ratio (%) | Repeat (%) |
|----------------|-------------|------------------|--------------------------|------------------------|------------|
| 67,447,918,210 | 88          | 766              | 755                      | 0.60                   | 45.32      |

Table S3 Statistics of the HiFilon reads data produced by the PacBioSequel II platform

| Read number | Base count (Gb) | Mean length (bp) | N50 (bp) | N90 (bp) | GC Content (%) |
|-------------|-----------------|------------------|----------|----------|----------------|
| 2,019,045   | 37,047,609,214  | 18,349.17        | 18,569   | 13,738   | 39.89          |

Table S4 Statistics for Hi-C reads data produced MGIDNB T7 platform

| Read number | Base count (Gb) | Mean length (bp) | Q20 (%) | Q30 (%) | GC Content (%) |
|-------------|-----------------|------------------|---------|---------|----------------|
| 787,856,392 | 118.16          | 150              | 98.86   | 95.84   | 39.89          |

Table S5 Statistics of the pseudochromosome assemblies for *Taenioides* sp based on Hi-C data

| Chromosome | Chr length (bp) | Length(bp)/Percentage(%) | Contig number | Gene number |
|------------|-----------------|--------------------------|---------------|-------------|
| chr1       | 43,849,507      | 5.67055                  | 16            | 1,405       |
| chr2       | 36,838,452      | 4.76389                  | 16            | 1,136       |
| chr3       | 37,267,491      | 4.81937                  | 11            | 1,127       |
| chr4       | 35,891,044      | 4.64137                  | 3             | 1,144       |
| chr5       | 35,514,071      | 4.59262                  | 6             | 1,102       |
| chr6       | 37,216,381      | 4.81276                  | 11            | 1,195       |
| chr7       | 38,191,833      | 4.93891                  | 15            | 983         |
| chr8       | 36,467,273      | 4.71589                  | 5             | 1,052       |
| chr9       | 33,492,621      | 4.33121                  | 13            | 978         |
| chr10      | 34,184,133      | 4.42064                  | 7             | 876         |
| chr11      | 34,473,377      | 4.45804                  | 6             | 1,005       |
| chr12      | 32,631,565      | 4.21986                  | 14            | 1,086       |
| chr13      | 31,731,700      | 4.10349                  | 6             | 911         |
| chr14      | 32,878,221      | 4.25176                  | 7             | 1,007       |
| chr15      | 33,700,152      | 4.35805                  | 4             | 895         |
| chr16      | 34,207,569      | 4.42367                  | 17            | 916         |
| chr17      | 30,406,762      | 3.93216                  | 12            | 1,094       |
| chr18      | 29,825,879      | 3.85704                  | 6             | 929         |
| chr19      | 27,503,843      | 3.55675                  | 11            | 788         |
| chr20      | 27,897,921      | 3.60772                  | 2             | 897         |
| chr21      | 27,022,322      | 3.49448                  | 8             | 642         |
| chr22      | 26,366,292      | 3.40965                  | 6             | 736         |
| chr23      | 18,787,286      | 2.42954                  | 2             | 456         |

Table S6 The mapping ratio of the short reads to the assembled genome of *Taenioides* sp

| Mapping rate (%) | Paired mapping rate (%) | Average sequencing depth | Coverage (%) | Coverage at least 4X (%) | Coverage at least 10X (%) | Coverage at least 20X (%) |
|------------------|-------------------------|--------------------------|--------------|--------------------------|---------------------------|---------------------------|
| 99.64            | 92.23                   | 95.11                    | 99.80        | 99.43                    | 98.83                     | 97.79                     |

Table S7 The mapping ratio of the PacBioHiFi long reads to the assembled genome of *Taenioides* sp

| Mapping rate (%) | Average sequencing depth | Coverage (%) | Coverage at least 4X (%) | Coverage at least 10X (%) | Coverage at least 20X (%) |
|------------------|--------------------------|--------------|--------------------------|---------------------------|---------------------------|
| 99.97            | 47.56                    | 100.00       | 99.83                    | 99.25                     | 97.12                     |

Table S8. Statistics for genome synteny among *Taenioides* sp and three other telost species

| Species pairs (A/B)                                  | Align length (A/B) | Genome size (A) | The ratio in A (%) | Genome size (B) | The ratio in B (%) |
|------------------------------------------------------|--------------------|-----------------|--------------------|-----------------|--------------------|
| <i>Taenioides</i> sp/<br><i>Danio rerio</i>          | 1,353,139          | 773,284,894     | 0.17               | 1,679,203,469   | 0.08               |
| <i>Taenioides</i> sp /<br><i>Larimichthys crocea</i> | 360,528            | 773,284,894     | 0.05               | 657,939,657     | 0.05               |
| <i>Taenioides</i> sp/<br><i>Salarias fasciatus</i>   | 687,455            | 773,284,894     | 0.09               | 797,507,141     | 0.09               |

Table S9. Statistics of the annotated repeat sequences in the assembled genome of *Taenioides* sp

| Type         | Repeat Size (bp) | % of genome |
|--------------|------------------|-------------|
| Trf          | 62,097,661       | 8.03        |
| Repeatmasker | 94,388,556       | 12.21       |
| Proteinmask  | 42,770,606       | 5.53        |
| De novo      | 288,666,776      | 37.33       |
| Total        | 365,871,704      | 47.31       |

Table S10 Statistics of the annotated TEs in the assembled genome of *Taenioides* sp

| Terms        | RepBase TEs |             | TE Proteins |             | De novo     |             | Combined TEs |             |
|--------------|-------------|-------------|-------------|-------------|-------------|-------------|--------------|-------------|
|              | Length (bp) | % in Genome | Length (bp) | % in Genome | Length (bp) | % in Genome | Length (bp)  | % in Genome |
| DNA          | 38,687,948  | 5.00        | 8,865,091   | 1.15        | 76,930,338  | 9.95        | 96,964,695   | 12.54       |
| LINE         | 42,616,593  | 5.51        | 28,877,153  | 3.73        | 59,418,947  | 7.68        | 79,156,087   | 10.24       |
| SINE         | 4,496,652   | 0.58        | 0           | 0           | 4,682,110   | 0.61        | 7,851,677    | 1.02        |
| LTR          | 10,862,485  | 1.40        | 5,043,643   | 0.65        | 37,990,036  | 4.91        | 46,801,379   | 6.05        |
| Satellite    | 3,591,066   | 0.46        | 0           | 0.00        | 1,365,041   | 0.18        | 4,885,960    | 0.63        |
| Simplerepeat | 0           | 0.00        | 0           | 0.00        | 575,011     | 0.07        | 575,011      | 0.07        |
| Other        | 33,469      | 0.00        | 0           | 0.00        | 0           | 0.00        | 33,469       | 0.00        |
| Unknown      | 918,627     | 0.12        | 4,545       | 0.00        | 121,960,265 | 15.77       | 122,756,741  | 15.87       |
| Total        | 94,388,556  | 12.21       | 42,770,606  | 5.53        | 288,666,776 | 37.33       | 334,958,026  | 43.32       |

Table S11. Statistics of the TEs content in the assembled genome of *Taenioides* sp

| Species |             | <i>Taenioides</i> sp. |              |                 |
|---------|-------------|-----------------------|--------------|-----------------|
| Types   | Types       | length                | ratio in TEs | ratio in genome |
| DNA     | Academ      | 1,813,369             | 0.541372011  | 0.234502059     |
| DNA     | CMC         | 12,053,059            | 3.59837892   | 1.558682847     |
| DNA     | CMC-Chapaev | 191,981               | 0.057314942  | 0.024826684     |
| DNA     | Crypton     | 1,673,431             | 0.499594239  | 0.216405495     |
| DNA     | DNA         | 2,867,084             | 0.855953217  | 0.370766844     |
| DNA     | Dada        | 327,791               | 0.097860321  | 0.042389422     |
| DNA     | Ginger      | 1,015,780             | 0.303255907  | 0.13135909      |
| DNA     | Helitron    | 3,427,403             | 1.02323358   | 0.443226426     |
| DNA     | IS3EU       | 476,915               | 0.142380526  | 0.061673906     |
| DNA     | Kolobok     | 594,240               | 0.177407303  | 0.076846193     |
| DNA     | MULE        | 1,277,353             | 0.381347184  | 0.165185304     |
| DNA     | Maverick    | 1,447,145             | 0.432037714  | 0.187142541     |
| DNA     | Merlin      | 254,947               | 0.076113119  | 0.03296935      |
| DNA     | Novosib     | 897,264               | 0.267873563  | 0.116032785     |
| DNA     | P           | 365,467               | 0.109108298  | 0.047261624     |
| DNA     | PIF         | 6,296,280             | 1.879722088  | 0.814225139     |
| DNA     | PiggyBac    | 433,449               | 0.129403975  | 0.056052951     |
| DNA     | Sola        | 1,600,626             | 0.47785868   | 0.206990465     |
| DNA     | TcMar       | 20,818,795            | 6.215344426  | 2.692254195     |
| DNA     | Zator       | 2,021                 | 0.000603359  | 0.000261353     |
| DNA     | Zisupton    | 850,694               | 0.253970329  | 0.110010425     |
| DNA     | hAT         | 45,016,993            | 13.43959228  | 5.821527531     |
| LINE    | CR1         | 783,206               | 0.233822133  | 0.101282982     |
| LINE    | CRE         | 85,180                | 0.025430052  | 0.011015345     |
| LINE    | Deceiver    | 892                   | 0.000266302  | 0.000115352     |
| LINE    | Dong-R4     | 2,668,860             | 0.796774459  | 0.345132825     |
| LINE    | Dualen      | 1,697                 | 0.000506631  | 0.000219453     |
| LINE    | Genie       | 138                   | 4.11992E-05  | 1.78459E-05     |
| LINE    | I           | 359,683               | 0.107381514  | 0.046513646     |
| LINE    | L1          | 5,763,413             | 1.720637379  | 0.745315607     |
| LINE    | L2          | 22,067,031            | 6.58799888   | 2.853674134     |
| LINE    | LINE        | 36,357                | 0.010854196  | 0.004701631     |
| LINE    | Penelope    | 13,632,157            | 4.069810526  | 1.762889345     |
| LINE    | Proto1      | 27,150                | 0.008105493  | 0.003510996     |
| LINE    | Proto2      | 144,691               | 0.043196756  | 0.018711215     |
| LINE    | R1          | 507,683               | 0.151566155  | 0.065652776     |
| LINE    | R2          | 373,496               | 0.111505314  | 0.048299922     |
| LINE    | RTE         | 13,938,293            | 4.161205858  | 1.802478376     |
| LINE    | Rex-Babar   | 21,325,198            | 6.366528444  | 2.757741444     |
| LINE    | Tad1        | 14,638                | 0.0043701    | 0.001892963     |

|           |              |             |             |             |
|-----------|--------------|-------------|-------------|-------------|
| LTR       | Caulimoviru  | 1,170       | 0.000349297 | 0.000151303 |
| LTR       | Caulimovirus | 24,348      | 0.00726897  | 0.003148645 |
| LTR       | Copia        | 570,343     | 0.170272976 | 0.07375587  |
| LTR       | DIRS         | 789,108     | 0.235584145 | 0.102046219 |
| LTR       | ERV          | 253,073     | 0.075553646 | 0.032727007 |
| LTR       | ERV1         | 3,247,760   | 0.969602084 | 0.419995273 |
| LTR       | ERV4         | 66,226      | 0.019771432 | 0.008564243 |
| LTR       | ERVK         | 436,055     | 0.130181983 | 0.056389955 |
| LTR       | ERVL         | 125,611     | 0.03750052  | 0.016243819 |
| LTR       | Gypsy        | 17,113,325  | 5.109095371 | 2.213068577 |
| LTR       | LTR          | 207,226     | 0.061866259 | 0.026798144 |
| LTR       | Ngaro        | 21,763,663  | 6.49742992  | 2.814443056 |
| LTR       | Pao          | 2,801,448   | 0.836357926 | 0.362278899 |
| LTR       | Viper        | 1,633       | 0.000487524 | 0.000211177 |
| LTR       | Copia        | 104         | 3.10487E-05 | 1.34491E-05 |
| SINE      | 5S           | 287,623     | 0.085868371 | 0.037194959 |
| SINE      | 5S-Core      | 8,732       | 0.002606894 | 0.001129209 |
| SINE      | 5S-Deu       | 211,027     | 0.063001028 | 0.027289683 |
| SINE      | 5S-Sauria    | 157,528     | 0.047029176 | 0.020371276 |
| SINE      | 7SL          | 141         | 4.20948E-05 | 1.82339E-05 |
| SINE      | Alu          | 2,877       | 0.000858914 | 0.000372049 |
| SINE      | B2           | 585         | 0.000174649 | 7.56513E-05 |
| SINE      | B4           | 2,717       | 0.000811146 | 0.000351358 |
| SINE      | Ceph         | 492         | 0.000146884 | 6.36247E-05 |
| SINE      | ID           | 1,448       | 0.000432293 | 0.000187253 |
| SINE      | MIR          | 4,716,608   | 1.408119118 | 0.609944412 |
| SINE      | SINE         | 1,375,157   | 0.410546066 | 0.177833165 |
| SINE      | U            | 4,081       | 0.001218362 | 0.000527749 |
| SINE      | tRNA         | 1,179,418   | 0.352109192 | 0.152520502 |
| SINE      | tRNA-Ceph    | 73          | 2.17938E-05 | 9.44025E-06 |
| SINE      | tRNA-Core    | 2,947       | 0.000879812 | 0.000381101 |
| SINE      | tRNA-Deu     | 19,201      | 0.00573236  | 0.002483043 |
| SINE      | tRNA-Sauria  | 3,405       | 0.001016545 | 0.000440329 |
| SINE      | tRNA-V       | 268,031     | 0.08001928  | 0.034661352 |
| SINE      | tRNA-V-Core  | 33,594      | 0.010029316 | 0.004344324 |
| Satellite | Satellite    | 4,868,557   | 1.453482712 | 0.62959422  |
| Unknown   | Helitro      | 4,545       | 0.001356886 | 0.000587752 |
| Unknown   | Unknown      | 122,751,321 | 36.64677705 | 15.87400995 |
| Unknown   | centromeric  | 875         | 0.000261227 | 0.000113154 |

Table S12. Statistics of annotated protein-coding genes in *Taenioides* sp

| Total number of genes | Average length of gene (bp) | Average length of CDS (bp) | Average number of exon | Average length of exon (bp) | Average length of intron (bp) | Average length of intergenic region (bp) | Rate of single exon gene(%) |
|-----------------------|-----------------------------|----------------------------|------------------------|-----------------------------|-------------------------------|------------------------------------------|-----------------------------|
| 22,399                | 14,624.84                   | 1,686.47                   | 10.15                  | 240.91                      | 1,330.86                      | 20,087.17                                | 8.23                        |

Table S13 GO enrichment of gene families that were expanded in *Taenioides* sp (P<0.05)

| GO ID      | Description                                        | Count | GeneRatio | BgRatio   | P value  | P.adjust |
|------------|----------------------------------------------------|-------|-----------|-----------|----------|----------|
| GO:0071526 | semaphorin-plexin signaling pathway                | 16    | 16/138    | 19/15263  | 7.71E-31 | 3.32E-29 |
| GO:0017154 | semaphorin receptor activity                       | 16    | 16/138    | 21/15263  | 1.59E-29 | 3.43E-28 |
| GO:0006352 | DNA-templated transcription, initiation            | 9     | 9/138     | 25/15263  | 5.61E-13 | 8.04E-12 |
| GO:0051262 | protein tetramerization                            | 7     | 7/138     | 15/15263  | 2.57E-11 | 2.76E-10 |
| GO:0015074 | DNA integration                                    | 9     | 9/138     | 39/15263  | 5.23E-11 | 4.49E-10 |
| GO:0005085 | guanyl-nucleotide exchange factor activity         | 9     | 9/138     | 62/15263  | 4.20E-09 | 3.01E-08 |
| GO:0000786 | nucleosome                                         | 9     | 9/138     | 76/15263  | 2.65E-08 | 1.63E-07 |
| GO:0007264 | small GTPase mediated signal transduction          | 9     | 9/138     | 132/15263 | 3.08E-06 | 1.65E-05 |
| GO:0005261 | cation channel activity                            | 4     | 4/138     | 13/15263  | 4.29E-06 | 2.05E-05 |
| GO:0030414 | peptidase inhibitor activity                       | 4     | 4/138     | 14/15263  | 5.97E-06 | 2.57E-05 |
| GO:0005525 | GTP binding                                        | 14    | 14/138    | 433/15263 | 3.80E-05 | 1.48E-04 |
| GO:0007286 | spermatid development                              | 3     | 3/138     | 10/15263  | 8.28E-05 | 2.46E-04 |
| GO:0046718 | viral entry into host cell                         | 3     | 3/138     | 10/15263  | 8.28E-05 | 2.46E-04 |
| GO:0050839 | cell adhesion molecule binding                     | 3     | 3/138     | 10/15263  | 8.28E-05 | 2.46E-04 |
| GO:0016757 | transferase activity, transferring glycosyl groups | 5     | 5/138     | 50/15263  | 8.59E-05 | 2.46E-04 |
| GO:0006879 | cellular iron ion homeostasis                      | 3     | 3/138     | 14/15263  | 2.44E-04 | 6.58E-04 |
| GO:0005911 | cell-cell junction                                 | 3     | 3/138     | 16/15263  | 3.72E-04 | 8.41E-04 |
| GO:0042803 | protein homodimerization activity                  | 3     | 3/138     | 16/15263  | 3.72E-04 | 8.41E-04 |
| GO:0046982 | protein heterodimerization activity                | 3     | 3/138     | 16/15263  | 3.72E-04 | 8.41E-04 |
| GO:0016746 | transferase activity, transferring acyl groups     | 4     | 4/138     | 40/15263  | 4.54E-04 | 9.76E-04 |
| GO:0008152 | metabolic process                                  | 8     | 8/138     | 236/15263 | 1.37E-03 | 2.81E-03 |
| GO:0008237 | metallopeptidase activity                          | 4     | 4/138     | 71/15263  | 3.89E-03 | 7.61E-03 |
| GO:0034220 | ion transmembrane transport                        | 4     | 4/138     | 83/15263  | 6.77E-03 | 1.27E-02 |
| GO:0006812 | cation transport                                   | 3     | 3/138     | 45/15263  | 7.78E-03 | 1.39E-02 |
| GO:0008009 | chemokine activity                                 | 2     | 2/138     | 23/15263  | 1.81E-02 | 3.12E-02 |
| GO:0004222 | metalloendopeptidase activity                      | 4     | 4/138     | 121/15263 | 2.41E-02 | 3.99E-02 |
| GO:0005615 | extracellular space                                | 3     | 3/138     | 73/15263  | 2.84E-02 | 4.53E-02 |
| GO:0007155 | cell adhesion                                      | 4     | 4/138     | 134/15263 | 3.33E-02 | 5.13E-02 |
| GO:0004867 | serine-type endopeptidase inhibitor activity       | 2     | 2/138     | 38/15263  | 4.62E-02 | 6.84E-02 |

Table S14 Enrichment of KEGG pathways of gene families that were expanded in *Taenioides* sp (P<0.05)

| KEGG ID | Description                                  | Count | GeneRatio | BgRatio  | P value  | P.adjust  |
|---------|----------------------------------------------|-------|-----------|----------|----------|-----------|
| ko04640 | Hematopoietic cell lineage                   | 14    | 14/99     | 96/8417  | 4.10E-12 | 3.98E-10  |
| ko04662 | B cell receptor signaling pathway            | 14    | 14/99     | 112/8417 | 3.53E-11 | 1.71E-09  |
| ko05330 | Allograft rejection                          | 11    | 11/99     | 65/8417  | 1.79E-10 | 5.79E-09  |
| ko05320 | Autoimmune thyroid disease                   | 11    | 11/99     | 67/8417  | 2.52E-10 | 6.12E-09  |
| ko04145 | Phagosome                                    | 16    | 16/99     | 205/8417 | 1.63E-09 | 3.16E-08  |
| ko05152 | Tuberculosis                                 | 16    | 16/99     | 222/8417 | 5.20E-09 | 8.40E-08  |
| ko04360 | Axon guidance                                | 17    | 17/99     | 275/8417 | 1.67E-08 | 2.31E-07  |
| ko05416 | Viral myocarditis                            | 11    | 11/99     | 107/8417 | 4.13E-08 | 5.01E-07  |
| ko04514 | Cell adhesion molecules                      | 15    | 15/99     | 242/8417 | 1.23E-07 | 1.33E-06  |
| ko04072 | Phospholipase D signaling pathway            | 14    | 14/99     | 223/8417 | 2.89E-07 | 2.80E-06  |
| ko05150 | Staphylococcus aureus infection              | 8     | 8/99      | 68/8417  | 1.14E-06 | 1.00E-05  |
| ko05310 | Asthma                                       | 5     | 5/99      | 21/8417  | 3.56E-06 | 2.88E-05  |
| ko04610 | Complement and coagulation cascades          | 8     | 8/99      | 91/8417  | 1.05E-05 | 7.82E-05  |
| ko05332 | Graft-versus-host disease                    | 6     | 6/99      | 52/8417  | 2.99E-05 | 2.07 E-04 |
| ko04650 | Natural killer cell mediated cytotoxicity    | 8     | 8/99      | 118/8417 | 6.95E-05 | 4.48 E-04 |
| ko05322 | Systemic lupus erythematosus                 | 8     | 8/99      | 119/8417 | 7.38E-05 | 4.48 E-04 |
| ko04672 | Intestinal immune network for IgA production | 5     | 5/99      | 39/8417  | 8.53E-05 | 4.87 E-04 |
| ko05340 | Primary immunodeficiency                     | 5     | 5/99      | 40/8417  | 9.66E-05 | 5.20 E-04 |
| ko04940 | Type I diabetes mellitus                     | 6     | 6/99      | 66/8417  | 1.17E-04 | 5.96 E-04 |
| ko05143 | African trypanosomiasis                      | 5     | 5/99      | 48/8417  | 2.33E-04 | 1.09 E-03 |
| ko05146 | Amoebiasis                                   | 8     | 8/99      | 141/8417 | 2.41E-04 | 1.09 E-03 |
| ko04720 | Long-term potentiation                       | 7     | 7/99      | 107/8417 | 2.51E-04 | 1.09 E-03 |
| ko00512 | Mucin type O-glycan biosynthesis             | 5     | 5/99      | 49/8417  | 2.57E-04 | 1.09 E-03 |
| ko05204 | Chemical carcinogenesis                      | 5     | 5/99      | 50/8417  | 2.83E-04 | 1.15 E-03 |
| ko04670 | Leukocyte transendothelial migration         | 9     | 9/99      | 197/8417 | 4.93E-04 | 1.87 E-03 |
| ko05323 | Rheumatoid arthritis                         | 6     | 6/99      | 86/8417  | 5.00E-04 | 1.87 E-03 |
| ko00514 | Other types of O-glycan biosynthesis         | 5     | 5/99      | 59/8417  | 6.16E-04 | 2.21 E-03 |
| ko04978 | Mineral absorption                           | 5     | 5/99      | 71/8417  | 1.43E-03 | 4.97 E-03 |
| ko04261 | Adrenergic signaling in cardiomyocytes       | 9     | 9/99      | 230/8417 | 1.49E-03 | 4.97 E-03 |
| ko04726 | Serotonergic synapse                         | 7     | 7/99      | 156/8417 | 2.35E-03 | 7.60 E-03 |
| ko04664 | Fc epsilon RI signaling pathway              | 5     | 5/99      | 83/8417  | 2.86E-03 | 8.95 E-03 |
| ko00983 | Drug metabolism - other enzymes              | 5     | 5/99      | 86/8417  | 3.34E-03 | 1.01 E-02 |

|         |                                             |    |       |          |          |           |
|---------|---------------------------------------------|----|-------|----------|----------|-----------|
| ko05140 | Leishmaniasis                               | 5  | 5/99  | 87/8417  | 3.51E-03 | 1.03 E-02 |
| ko00071 | Fatty acid degradation                      | 4  | 4/99  | 55/8417  | 3.88E-03 | 1.11 E-02 |
| ko04015 | Rap1 signaling pathway                      | 10 | 10/99 | 324/8417 | 4.64E-03 | 1.29 E-02 |
| ko05221 | Acute myeloid leukemia                      | 5  | 5/99  | 110/8417 | 9.41E-03 | 2.48 E-02 |
| ko05169 | Epstein-Barr virus infection                | 8  | 8/99  | 256/8417 | 1.04E-02 | 2.62 E-02 |
| ko01212 | Fatty acid metabolism                       | 4  | 4/99  | 73/8417  | 1.06E-02 | 2.62 E-03 |
| ko04064 | NF-kappa B signaling pathway                | 5  | 5/99  | 114/8417 | 1.09E-02 | 2.64 E-02 |
| ko03320 | PPAR signaling pathway                      | 4  | 4/99  | 87/8417  | 1.91E-02 | 4.51 E-02 |
| ko05170 | Human immunodeficiency virus<br>1 infection | 8  | 8/99  | 289/8417 | 2.02E-02 | 4.67 E-02 |
| ko04024 | cAMP signaling pathway                      | 9  | 9/99  | 353/8417 | 2.27E-02 | 5.13 E-02 |
| ko04216 | Ferroptosis                                 | 3  | 3/99  | 56/8417  | 2.79E-02 | 6.15 E-02 |
| ko04666 | Fc gamma R-mediated<br>phagocytosis         | 5  | 5/99  | 164/8417 | 4.38E-02 | 9.43 E-02 |
| ko04320 | Dorso-ventral axis formation                | 2  | 2/99  | 30/8417  | 4.81E-02 | 9.93 E-02 |

Table S15 GO enrichment of gene families that were contracted in *Taenioides* sp (P<0.05)

| GO ID      | Description                                                     | Count | GeneRatio | BgRatio   | P value  | P.adjust |
|------------|-----------------------------------------------------------------|-------|-----------|-----------|----------|----------|
| GO:0007156 | homophilic cell adhesion via plasma membrane adhesion molecules | 22    | 22/88     | 106/15263 | 6.84E-29 | 1.30E-27 |
| GO:0005622 | intracellular                                                   | 21    | 21/88     | 374/15263 | 1.90E-15 | 1.80E-14 |
| GO:0005328 | neurotransmitter:sodium symporter activity                      | 4     | 4/88      | 39/15263  | 7.27E-05 | 4.61E-04 |
| GO:0006836 | neurotransmitter transport                                      | 4     | 4/88      | 44/15263  | 1.17E-04 | 5.59E-04 |
| GO:0005615 | extracellular space                                             | 4     | 4/88      | 73/15263  | 8.29E-04 | 3.15E-03 |
| GO:0004866 | endopeptidase inhibitor activity                                | 2     | 2/88      | 13/15263  | 2.46E-03 | 7.79E-03 |
| GO:0004553 | hydrolase activity, hydrolyzing O-glycosyl compounds            | 2     | 2/88      | 30/15263  | 1.29E-02 | 3.49E-02 |
| GO:0005887 | integral component of plasma membrane                           | 3     | 3/88      | 118/15263 | 3.07E-02 | 7.30E-02 |
| GO:0005525 | GTP binding                                                     | 6     | 6/88      | 433/15263 | 3.89E-02 | 8.12E-02 |
| GO:0008146 | sulfotransferase activity                                       | 2     | 2/88      | 57/15263  | 4.27E-02 | 8.12E-02 |

Table S16 Enrichment of KEGG pathways with contracted gene families in *Taenioides* sp (P<0.05)

| KEGG ID | Description                                         | Count | GeneRatio | BgRatio  | P value  | P.adjust |
|---------|-----------------------------------------------------|-------|-----------|----------|----------|----------|
| ko04621 | NOD-like receptor signaling pathway                 | 12    | 12/31     | 168/8417 | 2.74E-13 | 1.45E-11 |
| ko04928 | Parathyroid hormone synthesis, secretion and action | 11    | 11/31     | 166/8417 | 7.59E-12 | 2.01E-10 |
| ko04610 | Complement and coagulation cascades                 | 3     | 3/31      | 91/8417  | 4.41E-03 | 5.85E-02 |
| ko00350 | Tyrosine metabolism                                 | 2     | 2/31      | 37/8417  | 8.07E-03 | 8.55E-02 |
| ko04623 | Cytosolic DNA-sensing pathway                       | 2     | 2/31      | 44/8417  | 1.13E-02 | 8.90E-02 |
| ko00620 | Pyruvate metabolism                                 | 2     | 2/31      | 51/8417  | 1.50E-02 | 8.90E-02 |
| ko00980 | Metabolism of xenobiotics by cytochrome P450        | 2     | 2/31      | 53/8417  | 1.61E-02 | 8.90E-02 |
| ko00982 | Drug metabolism - cytochrome P450                   | 2     | 2/31      | 53/8417  | 1.61E-02 | 8.90E-02 |
| ko00071 | Fatty acid degradation                              | 2     | 2/31      | 55/8417  | 1.73E-02 | 8.90E-02 |
| ko00830 | Retinol metabolism                                  | 2     | 2/31      | 57/8417  | 1.85E-02 | 8.90E-02 |
| ko05320 | Autoimmune thyroid disease                          | 2     | 2/31      | 67/8417  | 2.50E-02 | 1.05E-01 |
| ko04622 | RIG-I-like receptor signaling pathway               | 2     | 2/31      | 71/8417  | 2.79E-02 | 1.05E-01 |
| ko04978 | Mineral absorption                                  | 2     | 2/31      | 71/8417  | 2.79E-02 | 1.05E-01 |
| ko00010 | Glycolysis / Gluconeogenesis                        | 2     | 2/31      | 77/8417  | 3.24E-02 | 1.14E-01 |



Table S17 Candidate positively selected genes in *Taenioides* sp (P<0.05)

| Gene ID          | P value   | Corrected P value | Site_Num | Swissprot Annotation |
|------------------|-----------|-------------------|----------|----------------------|
| Tas_10G0000950.1 | 9.91E-07  | 2.16E-05          | 3        | <i>WDR11</i>         |
| Tas_10G0001140.1 | 3.31E-07  | 7.48E-06          | 15       | <i>MCMBP</i>         |
| Tas_10G0002210.1 | 4.31 E-03 | 4.47E-02          | 2        | <i>ARFGEF3</i>       |
| Tas_10G0002460.1 | 0         | 0.00E-00          | 73       | <i>EXO1</i>          |
| Tas_10G0003640.1 | 4.33E-08  | 1.14E-06          | 14       | <i>SPEF1</i>         |
| Tas_10G0003690.1 | 2.18E-10  | 7.29E-09          | 13       | <i>ECHS1</i>         |
| Tas_10G0004090.1 | 5.51 E-04 | 7.21E-03          | 9        | <i>MORN4</i>         |
| Tas_10G0004120.1 | 1.19E-10  | 4.13E-09          | 19       | <i>HPS1</i>          |
| Tas_10G0005320.1 | 2.99E-11  | 1.08E-09          | 8        | <i>SUPT3H</i>        |
| Tas_10G0005360.1 | 1.63E-07  | 3.99E-06          | 19       | <i>MCM8</i>          |
| Tas_10G0006770.1 | 8.47E-12  | 3.43E-10          | 16       | <i>RAD30</i>         |
| Tas_11G0000580.1 | 5.05E-11  | 1.79E-09          | 33       | <i>RABGGTA</i>       |
| Tas_11G0000780.1 | 0         | 0.00E+00          | 90       | <i>SCFD2</i>         |
| Tas_11G0002870.1 | 3.85E-05  | 6.32E-04          | 4        | <i>STIL</i>          |
| Tas_11G0003210.1 | 3.09 E-04 | 4.17E-03          | 5        | <i>IFI30</i>         |
| Tas_11G0004160.1 | 4.21E-10  | 1.33E-08          | 20       | <i>NR2C2AP</i>       |
| Tas_11G0006280.1 | 1.07 E-04 | 1.64E-03          | 22       | <i>MINDY4</i>        |
| Tas_11G0006650.1 | 4.23E-06  | 8.36E-05          | 3        | <i>VTG</i>           |
| Tas_11G0007390.1 | 0         | 0.00E-00          | 78       | <i>GMD</i>           |
| Tas_11G0007610.1 | 1.67 E-04 | 2.48E-03          | 3        | <i>C8orf82</i>       |
| Tas_12G0002890.1 | 6.74E-06  | 1.29E-04          | 13       | <i>LRRCC</i>         |
| Tas_12G0007060.1 | 0         | 0.00E-00          | 60       | <i>CACYBP</i>        |
| Tas_12G0007140.1 | 6.58E-10  | 1.98E-08          | 8        | <i>RAB6B</i>         |
| Tas_12G0008160.1 | 2.08E-06  | 4.36E-05          | 13       | <i>ASB10</i>         |
| Tas_12G0010440.1 | 6.43 E-04 | 8.30E-03          | 5        | <i>ARTD2</i>         |
| Tas_12G0010770.1 | 1.74 E-03 | 2.00E-02          | 8        | <i>ZNF622</i>        |
| Tas_13G0001010.1 | 3.40 E-03 | 3.65E-02          | 107      | <i>FAM176B</i>       |
| Tas_13G0004210.1 | 1.79E-09  | 5.27E-08          | 13       | <i>MATN1</i>         |
| Tas_13G0006730.1 | 5.24 E-04 | 6.91E-03          | 1        | <i>HAMAP</i>         |
| Tas_13G0007010.1 | 2.41 E-03 | 2.68E-02          | 2        | <i>TEKT2</i>         |
| Tas_13G0008470.1 | 1.79E-05  | 3.16E-04          | 6        | <i>DAZI</i>          |
| Tas_13G0008610.1 | 4.70 E-03 | 4.78E-02          | 4        | <i>FAM221A</i>       |
| Tas_14G0000170.1 | 3.95E-13  | 1.86E-11          | 13       | <i>DDX46</i>         |
| Tas_14G0000670.1 | 2.20 E-03 | 2.46E-02          | 4        | <i>LRWD1</i>         |
| Tas_14G0001700.1 | 6.31E-05  | 1.01E-03          | 13       | <i>F9</i>            |
| Tas_14G0003520.1 | 0         | 0.00E-00          | 62       | <i>DDX52</i>         |
| Tas_14G0006060.1 | 2.31E-05  | 3.98E-04          | 7        | <i>SHPK</i>          |
| Tas_14G0006250.1 | 3.20E-08  | 8.58E-07          | 31       | <i>SUPT4H1</i>       |
| Tas_15G0001270.1 | 6.81E-05  | 1.08E-03          | 6        | <i>SLC38A11</i>      |
| Tas_15G0001320.1 | 7.39E-08  | 1.92E-06          | 12       | <i>IFIH1</i>         |
| Tas_15G0004100.1 | 1.57 E-03 | 1.84E-02          | 3        | <i>TMEM30A</i>       |
| Tas_15G0004350.1 | 2.92 E-03 | 3.18E-02          | 3        | <i>UCHL3</i>         |

|                  |           |          |     |                 |
|------------------|-----------|----------|-----|-----------------|
| Tas_15G0004390.1 | 0         | 0.00E-00 | 77  | <i>GPR18</i>    |
| Tas_15G0004820.1 | 7.19 E-04 | 9.14E-03 | 7   | <i>TBCCD1</i>   |
| Tas_15G0005690.1 | 2.44E-15  | 1.77E-13 | 57  | <i>SLC12A8</i>  |
| Tas_15G0006810.1 | 0         | 0.00E-00 | 129 | <i>COPS8</i>    |
| Tas_15G0007130.1 | 2.12E-12  | 9.02E-11 | 27  | <i>LMLN</i>     |
| Tas_15G0007620.1 | 6.75E-06  | 1.29E-04 | 12  | <i>HSPBAP1</i>  |
| Tas_15G0008580.1 | 6.23E-09  | 1.78E-07 | 16  | <i>TMEM177</i>  |
| Tas_16G0000120.1 | 1.76 E-03 | 2.02E-02 | 0   | <i>RPB11a</i>   |
| Tas_16G0000230.1 | 1.01 E-04 | 1.56E-03 | 15  | <i>PNP</i>      |
| Tas_16G0000470.1 | 1.40E-05  | 2.49E-04 | 9   | <i>PXK</i>      |
| Tas_16G0002680.1 | 2.23E-07  | 5.18E-06 | 17  | <i>HISRS</i>    |
| Tas_16G0003400.1 | 1.73 E-03 | 2.00E-02 | 3   | <i>MRPL11</i>   |
| Tas_16G0003670.1 | 4.81 E-03 | 4.87E-02 | 1   | <i>TRM112</i>   |
| Tas_16G0003740.1 | 3.63E-12  | 1.50E-10 | 18  | <i>TRPT1</i>    |
| Tas_16G0005060.1 | 4.22E-05  | 6.86E-04 | 5   | <i>NUDCD2</i>   |
| Tas_16G0005820.1 | 3.47E-05  | 5.76E-04 | 10  | <i>INTS10</i>   |
| Tas_16G0006810.1 | 1.16 E-04 | 1.76E-03 | 0   | <i>NXT2</i>     |
| Tas_16G0007160.1 | 2.81 E-03 | 3.08E-02 | 11  | <i>MTUS1</i>    |
| Tas_16G0007750.1 | 2.04 E-03 | 2.31E-02 | 8   | <i>CIQTNF1</i>  |
| Tas_17G0003540.1 | 1.78 E-03 | 2.03E-02 | 6   | <i>PGLS</i>     |
| Tas_18G0000740.1 | 8.81 E-04 | 1.09E-02 | 10  | <i>ID3A</i>     |
| Tas_18G0001050.1 | 8.43E-06  | 1.53E-04 | 3   | <i>BDKRB2</i>   |
| Tas_18G0001150.1 | 1.25E-06  | 2.69E-05 | 10  | <i>DPH6</i>     |
| Tas_18G0001760.1 | 3.07 E-04 | 4.17E-03 | 3   | <i>RRH</i>      |
| Tas_18G0001990.1 | 2.62E-05  | 4.38E-04 | 5   | <i>MSH4</i>     |
| Tas_18G0002610.1 | 0         | 0.00E-00 | 31  | <i>FACM</i>     |
| Tas_18G0002670.1 | 3.00E-09  | 8.71E-08 | 18  | <i>DLK1</i>     |
| Tas_18G0004170.1 | 8.36E-06  | 1.53E-04 | 2   | <i>CCDC28B</i>  |
| Tas_18G0004180.1 | 2.36E-05  | 4.03E-04 | 4   | <i>TMEM39B</i>  |
| Tas_18G0004640.1 | 7.07E-06  | 1.34E-04 | 5   | <i>KCP3</i>     |
| Tas_18G0005800.1 | 1.29 E-03 | 1.53E-02 | 13  | <i>TRAPPC12</i> |
| Tas_18G0006860.1 | 3.70 E-03 | 3.95E-02 | 5   | <i>FBLN5</i>    |
| Tas_18G0006870.1 | 7.84E-06  | 1.45E-04 | 4   | <i>TRIP11</i>   |
| Tas_19G0001420.1 | 3.38E-13  | 1.64E-11 | 20  | <i>SNW1</i>     |
| Tas_19G0002900.1 | 0         | 0.00E-00 | 57  | <i>NBAS</i>     |
| Tas_19G0003520.1 | 8.70 E-04 | 1.09E-02 | 8   | <i>GATA4</i>    |
| Tas_19G0003540.1 | 7.42E-06  | 1.39E-04 | 17  | <i>FDFT1</i>    |
| Tas_19G0004240.1 | 3.82 E-03 | 4.05E-02 | 6   | <i>CEP57L1</i>  |
| Tas_19G0004330.1 | 4.13 E-03 | 4.31E-02 | 4   | <i>CCDC164</i>  |
| Tas_19G0006730.1 | 2.19 E-03 | 2.46E-02 | 4   | <i>MRPL19</i>   |
| Tas_1G0000210.1  | 0         | 0.00E-00 | 33  | <i>COG5</i>     |
| Tas_1G0004660.1  | 2.28E-05  | 3.97E-04 | 15  | <i>AMDHD1</i>   |
| Tas_1G0006530.1  | 5.34E-06  | 1.05E-04 | 6   | <i>NAIF1</i>    |
| Tas_1G0007860.1  | 0         | 0.00E-00 | 46  | <i>CWC27</i>    |

|                  |           |          |    |                 |
|------------------|-----------|----------|----|-----------------|
| Tas_1G0007970.1  | 4.44E-16  | 3.51E-14 | 31 | <i>PAR3</i>     |
| Tas_1G0008730.1  | 0         | 0.00E-00 | 78 | <i>PTCD2</i>    |
| Tas_1G0009310.1  | 1.27 E-03 | 1.52E-02 | 7  | <i>NUP54</i>    |
| Tas_1G0009530.1  | 1.90 E-04 | 2.69E-03 | 5  | <i>PRLR</i>     |
| Tas_1G0009670.1  | 2.50E-05  | 4.22E-04 | 6  | <i>NOP14</i>    |
| Tas_1G0010280.1  | 5.47E-14  | 3.07E-12 | 19 | <i>OAZ2</i>     |
| Tas_1G0011230.1  | 2.64 E-03 | 2.90E-02 | 2  | <i>LGP85</i>    |
| Tas_1G0011770.1  | 0         | 0.00E-00 | 58 | <i>NOC4</i>     |
| Tas_1G0012870.1  | 2.61E-07  | 5.97E-06 | 6  | <i>GTF3C3</i>   |
| Tas_20G0004590.1 | 1.03 E-03 | 1.26E-02 | 6  | <i>CCDC186</i>  |
| Tas_20G0006410.1 | 7.99E-07  | 1.78E-05 | 22 | <i>MED11</i>    |
| Tas_20G0007500.1 | 2.00E-06  | 4.25E-05 | 7  | <i>PIPPIN</i>   |
| Tas_20G0008100.1 | 5.88E-15  | 3.94E-13 | 46 | <i>SPATA20</i>  |
| Tas_20G0008320.1 | 6.40E-10  | 1.95E-08 | 9  | <i>FDXR</i>     |
| Tas_20G0008440.1 | 2.56E-14  | 1.49E-12 | 51 | <i>SAP30BP</i>  |
| Tas_21G0000470.1 | 2.29E-13  | 1.17E-11 | 12 | <i>RBCK1</i>    |
| Tas_21G0000840.1 | 1.10E-11  | 4.18E-10 | 24 | <i>ZC2HC1A</i>  |
| Tas_21G0001040.1 | 1.85E-14  | 1.11E-12 | 14 | <i>FEN1</i>     |
| Tas_21G0001340.1 | 6.79 E-04 | 8.69E-03 | 2  | <i>RBM40</i>    |
| Tas_21G0001650.1 | 2.22E-13  | 1.17E-11 | 17 | <i>MBTPS2</i>   |
| Tas_21G0003510.1 | 3.85E-10  | 1.24E-08 | 9  | <i>TMPRSS7</i>  |
| Tas_21G0003990.1 | 0         | 0.00E-00 | 44 | <i>MyD88</i>    |
| Tas_21G0004100.1 | 4.59 E-03 | 4.70E-02 | 1  | <i>CPB</i>      |
| Tas_21G0004140.1 | 8.84E-12  | 3.50E-10 | 11 | <i>PLSCR1</i>   |
| Tas_21G0005970.1 | 3.87 E-03 | 4.08E-02 | 4  | <i>IFT74</i>    |
| Tas_22G0001660.1 | 8.42E-07  | 1.86E-05 | 7  | <i>FAM28A</i>   |
| Tas_22G0002760.1 | 5.83E-13  | 2.67E-11 | 26 | <i>SEPSECS</i>  |
| Tas_22G0007140.1 | 2.13E-04  | 2.97E-03 | 2  | <i>TCP1</i>     |
| Tas_23G0002710.1 | 8.56E-08  | 2.19E-06 | 57 | <i>HDHD1</i>    |
| Tas_2G0002120.1  | 2.20E-07  | 5.17E-06 | 13 | <i>LETMD1</i>   |
| Tas_2G0003170.1  | 1.10E-11  | 4.18E-10 | 76 | <i>AURKAIP1</i> |
| Tas_2G0003880.1  | 3.08 E-03 | 3.33E-02 | 3  | <i>FBXW12</i>   |
| Tas_2G0004190.1  | 1.83E-14  | 1.11E-12 | 24 | <i>EXOSC10</i>  |
| Tas_2G0006220.1  | 0         | 0.00E-00 | 41 | <i>B4GALT3</i>  |
| Tas_2G0006340.1  | 1.61E-14  | 1.04E-12 | 18 | <i>UVPP</i>     |
| Tas_2G0007020.1  | 7.14E-05  | 1.12E-03 | 13 | <i>EIF2D</i>    |
| Tas_2G0009040.1  | 3.48E-06  | 7.05E-05 | 9  | <i>XPCC</i>     |
| Tas_2G0009520.1  | 1.92 E-04 | 2.70E-03 | 21 | <i>CELA2A</i>   |
| Tas_3G0000150.1  | 1.72 E-04 | 2.49E-03 | 9  | <i>PHF13</i>    |
| Tas_3G0003390.1  | 1.72E-11  | 6.36E-10 | 45 | <i>ABHD14B</i>  |
| Tas_3G0004460.1  | 2.22E-16  | 1.84E-14 | 34 | <i>RPUSD4</i>   |
| Tas_3G0005990.1  | 8.38 E-04 | 1.06E-02 | 3  | <i>RFESD</i>    |
| Tas_3G0007940.1  | 4.19E-06  | 8.36E-05 | 8  | <i>BLOC1S1</i>  |
| Tas_3G0007950.1  | 1.04E-12  | 4.52E-11 | 42 | <i>PXMP4</i>    |

|                 |           |          |     |                 |
|-----------------|-----------|----------|-----|-----------------|
| Tas_3G0008750.1 | 2.95E-10  | 9.70E-09 | 14  | <i>CIDEC</i>    |
| Tas_3G0008780.1 | 2.61 E-04 | 3.61E-03 | 5   | <i>HMCES</i>    |
| Tas_4G0003020.1 | 4.48 E-03 | 4.61E-02 | 3   | <i>CSF3R</i>    |
| Tas_4G0005330.1 | 4.16 E-04 | 5.53E-03 | 6   | <i>NSMCE2</i>   |
| Tas_4G0005430.1 | 1.08E-07  | 2.71E-06 | 4   | <i>CMC1</i>     |
| Tas_4G0006350.1 | 1.44E-10  | 4.91E-09 | 15  | <i>SMG9</i>     |
| Tas_4G0006870.1 | 2.78E-15  | 1.93E-13 | 22  | <i>CREB5</i>    |
| Tas_4G0007120.1 | 0         | 0.00E-00 | 80  | <i>BRD9</i>     |
| Tas_4G0009280.1 | 0         | 0.00E-00 | 23  | <i>KIF21A</i>   |
| Tas_5G0000020.1 | 6.32E-10  | 1.95E-08 | 16  | <i>RIOK1</i>    |
| Tas_5G0002900.1 | 2.82E-06  | 5.77E-05 | 15  | <i>IDUA</i>     |
| Tas_5G0003560.1 | 1.09E-07  | 2.71E-06 | 18  | <i>POLD2</i>    |
| Tas_5G0003600.1 | 1.80 E-04 | 2.58E-03 | 5   | <i>C5orf34</i>  |
| Tas_5G0005650.1 | 1.12 E-03 | 1.35E-02 | 3   | <i>POC5</i>     |
| Tas_5G0006370.1 | 1.11E-16  | 9.66E-15 | 18  | <i>CDC45</i>    |
| Tas_5G0006620.1 | 1.79E-07  | 4.28E-06 | 12  | <i>UTP15</i>    |
| Tas_5G0009120.1 | 2.56E-08  | 7.08E-07 | 28  | <i>QNG1</i>     |
| Tas_5G0010860.1 | 1.70 E-04 | 2.49E-03 | 9   | <i>TOP3B1</i>   |
| Tas_6G0000560.1 | 1.90 E-04 | 2.69E-03 | 3   | <i>RRP36</i>    |
| Tas_6G0002250.1 | 1.27 E-03 | 1.52E-02 | 5   | <i>ANKRD49</i>  |
| Tas_7G0000240.1 | 1.34 E-03 | 1.58E-02 | 17  | <i>WDHD1</i>    |
| Tas_7G0004770.1 | 0         | 0.00E-00 | 138 | <i>DNA2</i>     |
| Tas_7G0005010.1 | 2.86E-08  | 7.79E-07 | 8   | <i>CSTF3</i>    |
| Tas_8G0000190.1 | 1.02 E-03 | 1.25E-02 | 14  | <i>FAM96A</i>   |
| Tas_8G0000790.1 | 1.77E-07  | 4.28E-06 | 9   | <i>DEAF1</i>    |
| Tas_8G0001540.1 | 3.00 E-04 | 4.12E-03 | 6   | <i>RASSF9</i>   |
| Tas_8G0003360.1 | 1.08E-05  | 1.95E-04 | 12  | <i>RAD52</i>    |
| Tas_8G0004450.1 | 4.94E-05  | 7.96E-04 | 10  | <i>MRPS35</i>   |
| Tas_8G0006300.1 | 8.83 E-04 | 1.09E-02 | 5   | <i>RIC8A</i>    |
| Tas_8G0007450.1 | 3.31 E-04 | 4.44E-03 | 7   | <i>BBS2</i>     |
| Tas_8G0007720.1 | 6.38 E-04 | 8.29E-03 | 7   | <i>PMLP</i>     |
| Tas_8G0009260.1 | 1.70 E-04 | 2.49E-03 | 7   | <i>TSPAN33</i>  |
| Tas_8G0009760.1 | 2.20E-06  | 4.56E-05 | 9   | <i>NEIL1</i>    |
| Tas_8G0009940.1 | 4.13 E-03 | 4.31E-02 | 6   | <i>SSPN</i>     |
| Tas_9G0001760.1 | 6.09E-13  | 2.72E-11 | 45  | <i>LHFP16</i>   |
| Tas_9G0005370.1 | 1.44E-15  | 1.09E-13 | 64  | <i>KIAA0753</i> |
| Tas_9G0005950.1 | 1.48 E-04 | 2.22E-03 | 6   | <i>IASPP</i>    |
| Tas_9G0006270.1 | 9.69E-05  | 1.51E-03 | 11  | <i>GAB2</i>     |
| Tas_9G0006500.1 | 1.93E-13  | 1.05E-11 | 19  | <i>SMTL</i>     |

Table S18 GO enrichment of positively selected genes in *Taenioides* sp (P<0.05)

| GO ID      | Description                                      | Count | Gene Ratio | BgRatio   | P value   | P.adjust  |
|------------|--------------------------------------------------|-------|------------|-----------|-----------|-----------|
| GO:0004518 | nuclease activity                                | 3     | 3/119      | 15/15263  | 1.96 E-04 | 1.15E-02  |
| GO:0003684 | damaged DNA binding                              | 3     | 3/119      | 16/15263  | 2.40 E-04 | 1.15 E-02 |
| GO:0006270 | DNA replication initiation                       | 2     | 2/119      | 11/15263  | 3.17 E-02 | 9.24 E-02 |
| GO:0006281 | DNA repair                                       | 4     | 4/119      | 82/15263  | 3.85 E-03 | 9.24 E-02 |
| GO:0007596 | blood coagulation                                | 2     | 2/119      | 16/15263  | 6.73 E-03 | 1.17 E-01 |
| GO:0006915 | apoptotic process                                | 3     | 3/119      | 51/15263  | 7.33 E-03 | 1.17 E-01 |
| GO:0005840 | ribosome                                         | 4     | 4/119      | 113/15263 | 1.18 E-02 | 1.37 E-01 |
| GO:0005975 | carbohydrate metabolic process                   | 4     | 4/119      | 117/15263 | 1.33 E-02 | 1.37 E-01 |
| GO:0006139 | nucleobase-containing compound metabolic process | 2     | 2/119      | 23/15263  | 1.37 E-02 | 1.37 E-01 |
| GO:0006412 | translation                                      | 4     | 4/119      | 121/15263 | 1.48 E-02 | 1.37 E-01 |
| GO:0003735 | structural constituent of ribosome               | 4     | 4/119      | 123/15263 | 1.57 E-02 | 1.37 E-01 |

Table S19 Enrichment of KEGG pathways of positively selected genes in *Taenioides* sp (P<0.05)

| KEGG ID | Description                         | Count | GeneRatio | BgRatio | P value   | P.adjust  |
|---------|-------------------------------------|-------|-----------|---------|-----------|-----------|
| ko03410 | Base excision repair                | 4     | 4/58      | 33/8417 | 7.16E-05  | 1.01 E-02 |
| ko03030 | DNA replication                     | 3     | 3/58      | 36/8417 | 1.89 E-03 | 9.60 E-02 |
| ko03440 | Homologous recombination            | 3     | 3/58      | 37/8417 | 2.04 E-03 | 9.60 E-02 |
| ko04610 | Complement and coagulation cascades | 4     | 4/58      | 91/8417 | 3.48 E-03 | 1.23 E-01 |
| ko03460 | Fanconi anemia pathway              | 3     | 3/58      | 55/8417 | 6.32 E-03 | 1.78 E-01 |
| ko03430 | Mismatch repair                     | 2     | 2/58      | 23/8417 | 1.08 E-02 | 2.53 E-01 |
| ko03008 | Ribosome biogenesis in eukaryotes   | 3     | 3/58      | 73/8417 | 1.37 E-02 | 2.77 E-01 |
| ko00970 | Aminoacyl-tRNA biosynthesis         | 2     | 2/58      | 43/8417 | 3.52 E-02 | 5.51 E-01 |
| ko03420 | Nucleotide excision repair          | 2     | 2/58      | 43/8417 | 3.52 E-02 | 5.51 E-01 |
